# Supplementary material for: β2-Adrenergic receptor activation on donor cells ameliorates acute GvHD
Source: JCI journal article supplement (doi:10.1172/jci.insight.137788), 2020-05-21
Supplement: sd1 [file 1]

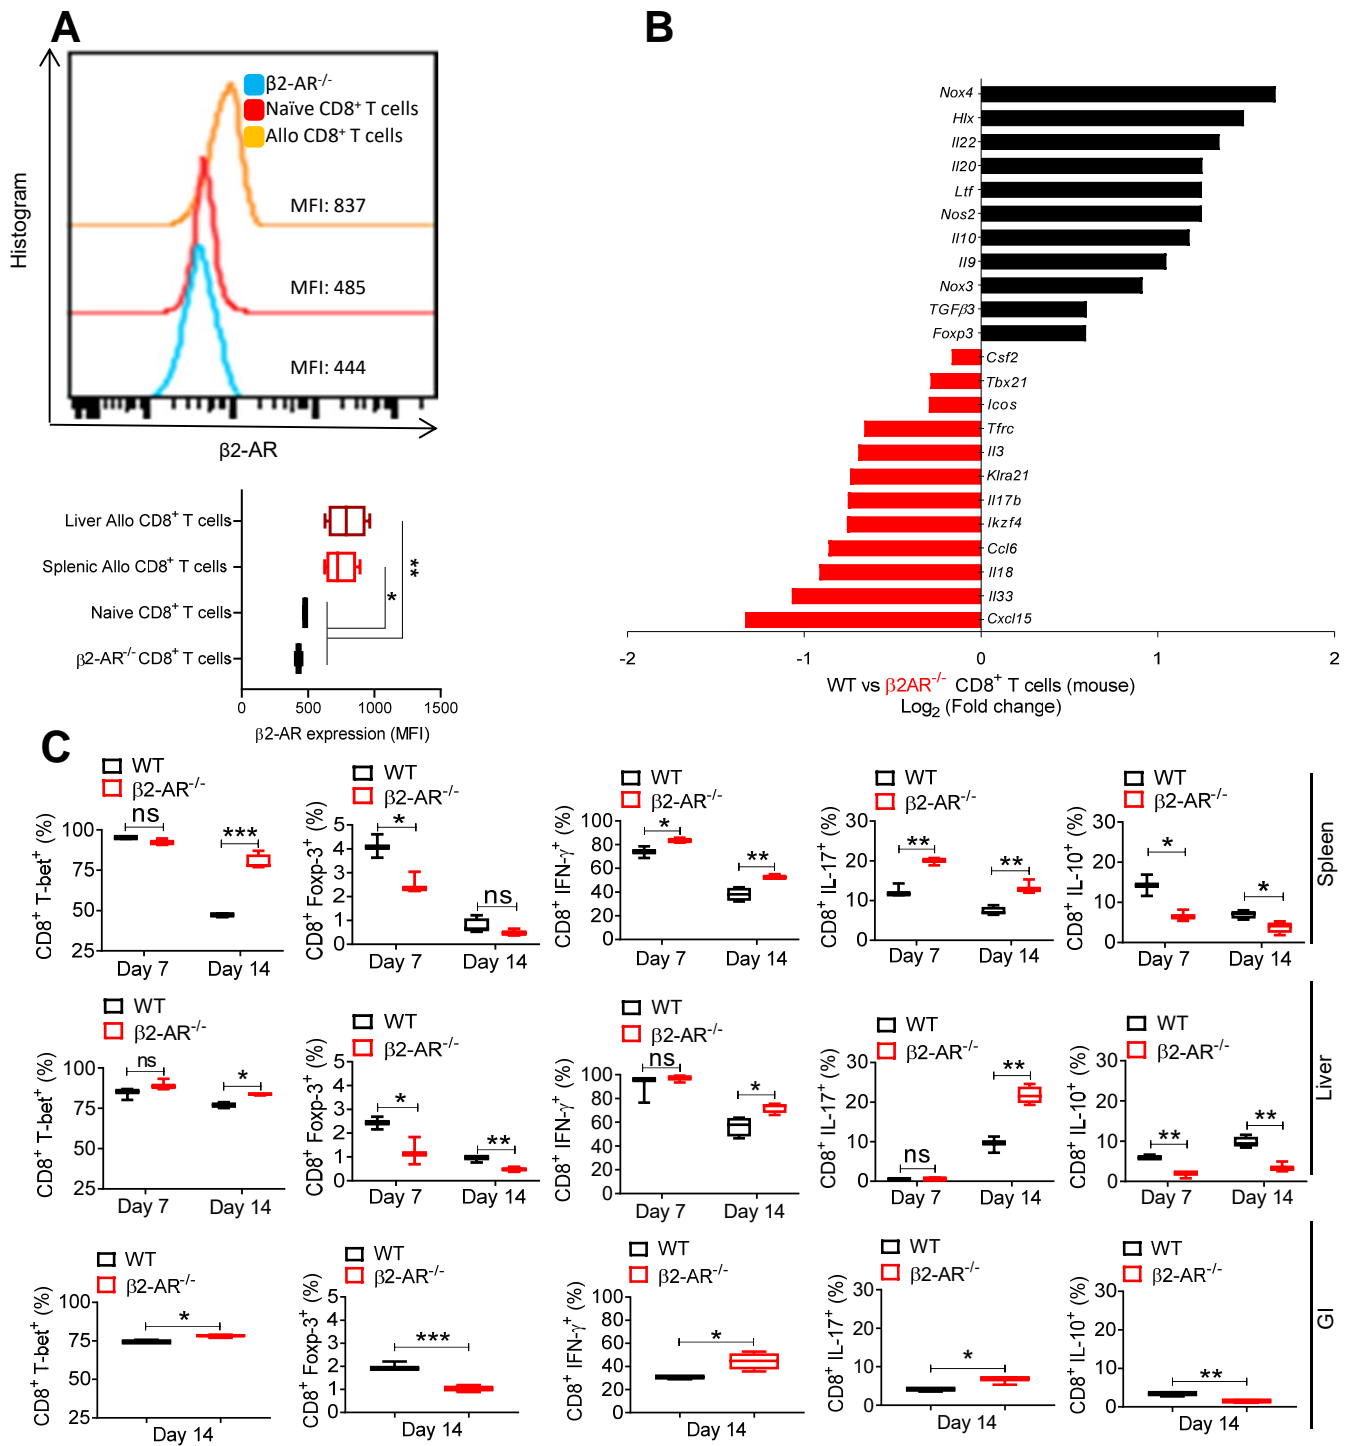

**Fig. S1. Expression of the  $\beta 2$ -AR in T cells regulates T cell phenotypes during allo-HCT responses.** (A)  $\beta 2$ -AR expression in WT or  $\beta 2$ -AR<sup>-/-</sup> CD8<sup>+</sup> T cells harvested from the spleen day 14 after allo-HCT. CD8<sup>+</sup> T cells were gated from single live H-2<sup>b+</sup> H-2<sup>d-</sup> CD45<sup>+</sup> CD3<sup>+</sup> cells ( $n=5$  per group from two independent replicates). (B) Immune related gene expression in WT or  $\beta 2$ -AR CD8<sup>+</sup> T cells sorted from the spleen day 14 after allo-HCT in B6 $\rightarrow$ BALB/c model transplanted with  $3.5 \times 10^6$  WT C57BL/6 TCD-BM alone or combined with  $0.7 \times 10^6$  WT C57BL/6 or  $\beta 2$ -AR<sup>-/-</sup> T cells using Nanostring mRNA micro array (Splenocytes pooled from 5-6 mice before CD8<sup>+</sup> T cell sorting). (C) T-bet, Foxp-3, IFN- $\gamma$ , IL-17, and IL-10 positive frequencies in CD8<sup>+</sup> T cells within single live H-2<sup>b+</sup> H-2<sup>d-</sup>CD45<sup>+</sup> CD3<sup>+</sup> populations from spleen and liver, 7 and 14 days and GI tract, 14 days after allo-HCT. (Pooled data from two individual experiments,  $n=5-6$  per group). For comparison of the means, an unpaired two-tailed  $t$  test was used in (C). \* $P < 0.05$ , \*\* $P < 0.01$ . Data are shown as median  $\pm$  min to max.

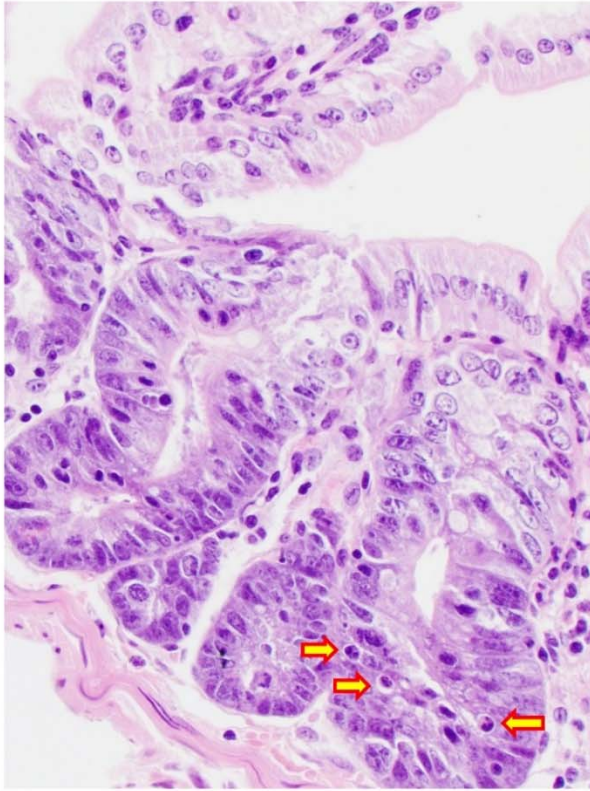

**WT T cells**

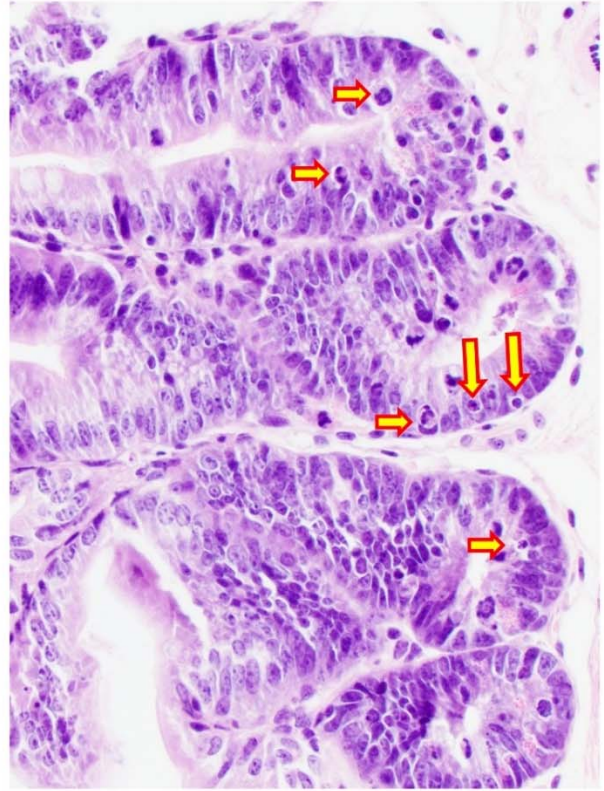

**$\beta 2\text{-AR}^{-/-}$  T cells**

**Small intestine**  
**Yellow arrow: Apoptosis**

WT T cells  
  $\beta 2\text{-AR}^{-/-}$  T cells

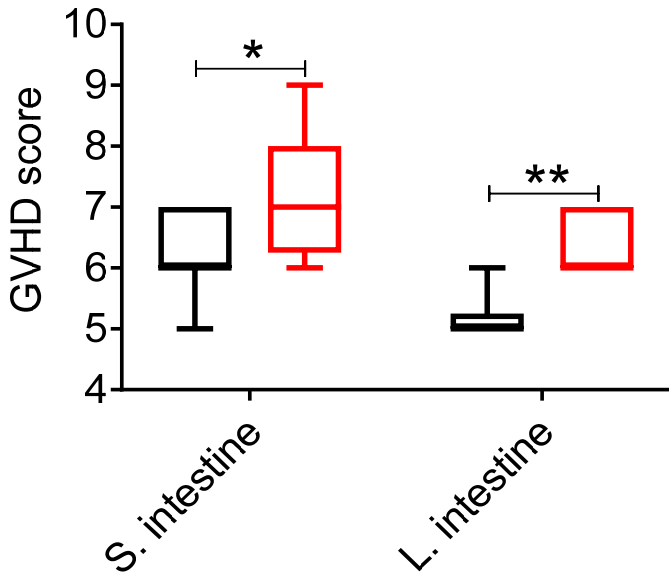

**Fig S2.** Clinical GvHD score and representative pathology figures (100x) in small and large intestine day 14 after allo-HCT (B6  $\rightarrow$  BALB/C) using  $3.5 \times 10^6$  WT C57BL/6 TCD-BM alone or combined with  $0.7 \times 10^6$  WT C57BL/6 or  $\beta 2\text{-AR}^{-/-}$  pan T cells. (Pooled data from at least three individual experiments, each with  $n=4-5$  per group). For comparison of the means, an unpaired two-tailed  $t$  test was used. \* $P < 0.05$ , \*\* $P < 0.01$ . Data are presented as median  $\pm$  min to max

**Fig. S3**

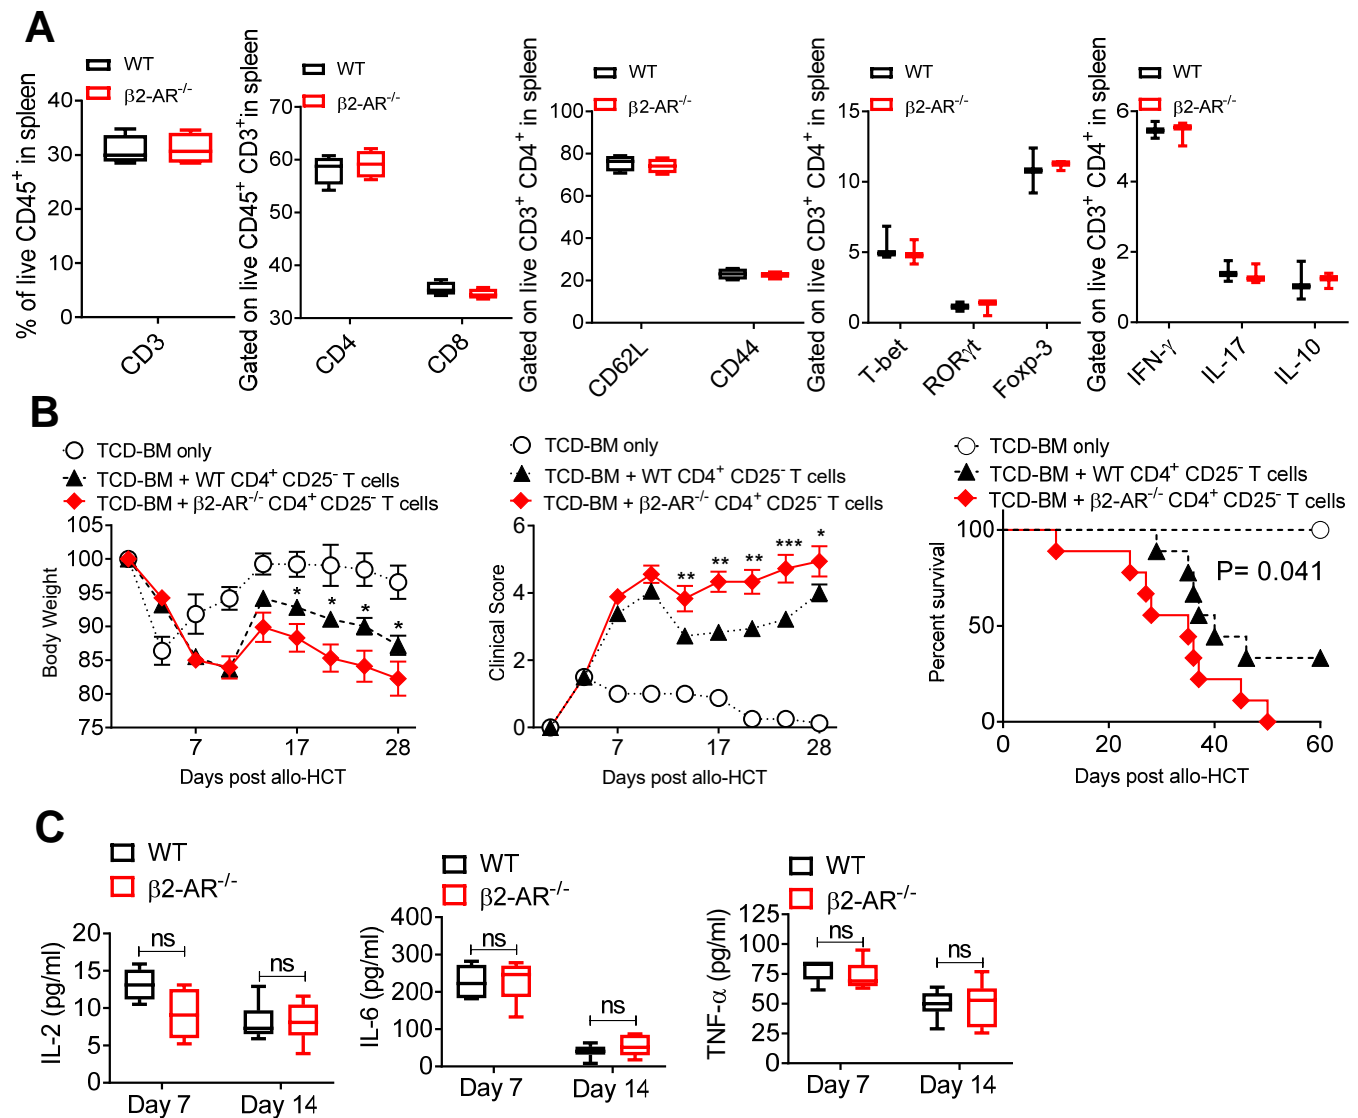

**Fig. S3. Comparative analysis of T cell phenotypes and plasma cytokine levels in WT and  $\beta 2\text{-AR}^{-/-}$  mice.** (A) Flow cytometric analysis of splenic T cell population frequencies, and cytokine expression in naïve C57BL/6 WT and  $\beta 2\text{-AR}^{-/-}$  mice. (Data from  $n=4$  per group). (B) Body weight and survival of lethally irradiated BALB/c mice after allo-HCT with  $3.5 \times 10^6$  WT C57BL/6 TCD-BM alone or combined with  $5 \times 10^4$  WT C57BL/6 or  $\beta 2\text{-AR}^{-/-}$  CD4<sup>+</sup> CD25<sup>-</sup> T cells. (Pooled data from two individual experiments,  $n=4-5$  per group, total of  $n=8-10$  per group). For comparison of survival curves, a log-rank (Mantel-Cox) test was used in (B). (C) Plasma inflammatory cytokine levels in irradiated BALB/c mice transplanted with TCD-BM plus WT or  $\beta 2\text{-AR}^{-/-}$  T cells 7 and 14 days after allo-HCT. For comparison of the means, an unpaired two-tailed  $t$  test was used in (A). Two-way analysis of variance (ANOVA) with Tukey's multiple comparisons test was used for body weight and clinical score difference in (B). \* $P < 0.05$ , \*\*\* $P < 0.001$ . Body weight, clinical score and survival data are shown as means  $\pm$  SEM. Other data are presented as median  $\pm$  min to max.

**Fig. S4**

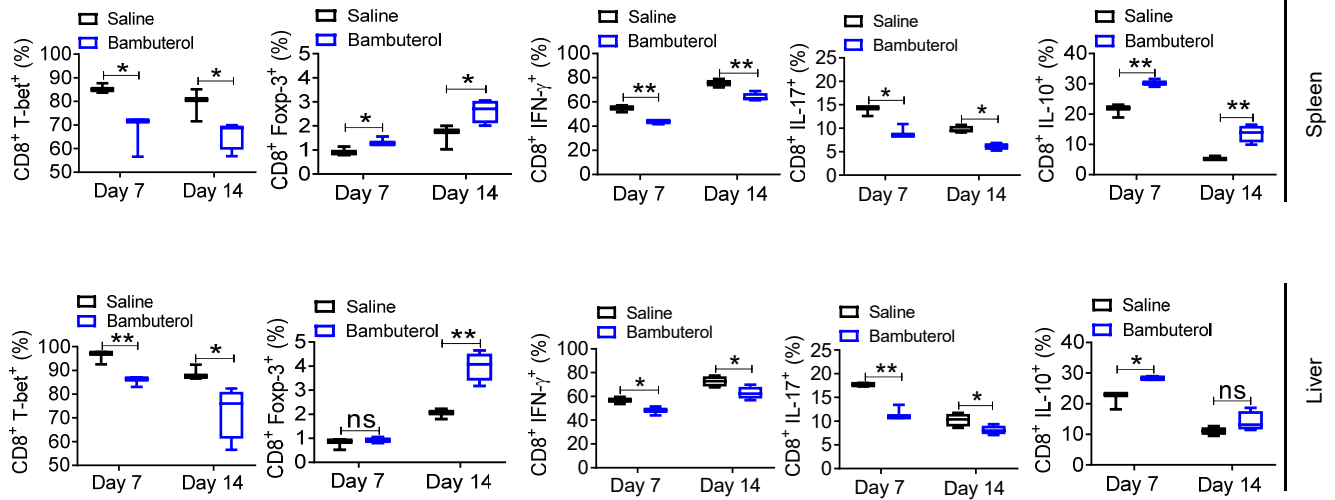

**Fig. S4. The activation of  $\beta$ 2-AR by the selective  $\beta$ 2-AR agonist bambuterol regulates the T cell phenotypes during allogeneic responses.** Frequencies of T-bet, Foxp-3, IFN- $\gamma$ , IL-17, and IL-10 positive frequencies in CD8<sup>+</sup> T cells within single live H-2<sup>b</sup><sup>+</sup> H-2<sup>d</sup>-CD45<sup>+</sup> CD3<sup>+</sup> populations from spleen and liver of mice 7 and 14 days after allo-HCT. B6  $\rightarrow$  BALB/c mice were transplanted with  $3.5 \times 10^6$  WT C57BL/6 TCD-BM combined with  $0.7 \times 10^6$  WT C57BL/6 pan T cells and treated with daily injection of saline and bambuterol. (Data pooled from two individual experiments, total  $n=5-6$  per group). For comparison of the means, an unpaired two-tailed t test was used. \* $P < 0.05$ , \*\* $P < 0.01$ . Data are presented as median  $\pm$  min to max.

**Fig. S5**

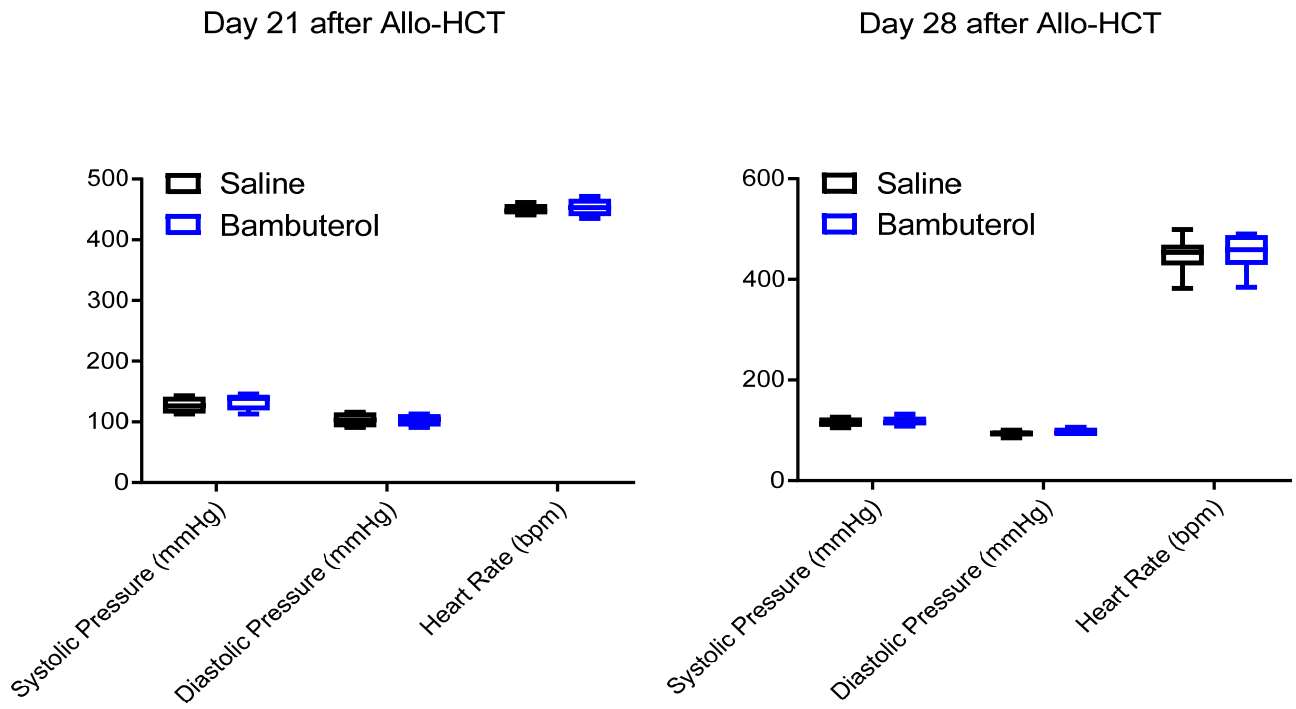

**Fig. S5. Daily injection of bambuterol does not change the blood pressure and heart rate in mice after Allo-HCT.** Blood pressure and heart rate in mice treated with saline or Bambuterol day 21 and 28 after allo-HCT (B6 →BABL/c). Lethally irradiated mice were transplanted with  $3.5 \times 10^6$  WT C57BL/6 TCD-BM combined with  $0.7 \times 10^6$  WT C57BL/6 pan T cells. Mice were injected daily with saline or Bambuterol after allo-HCT. Data are presented as median  $\pm$  min to max.

Fig. S6

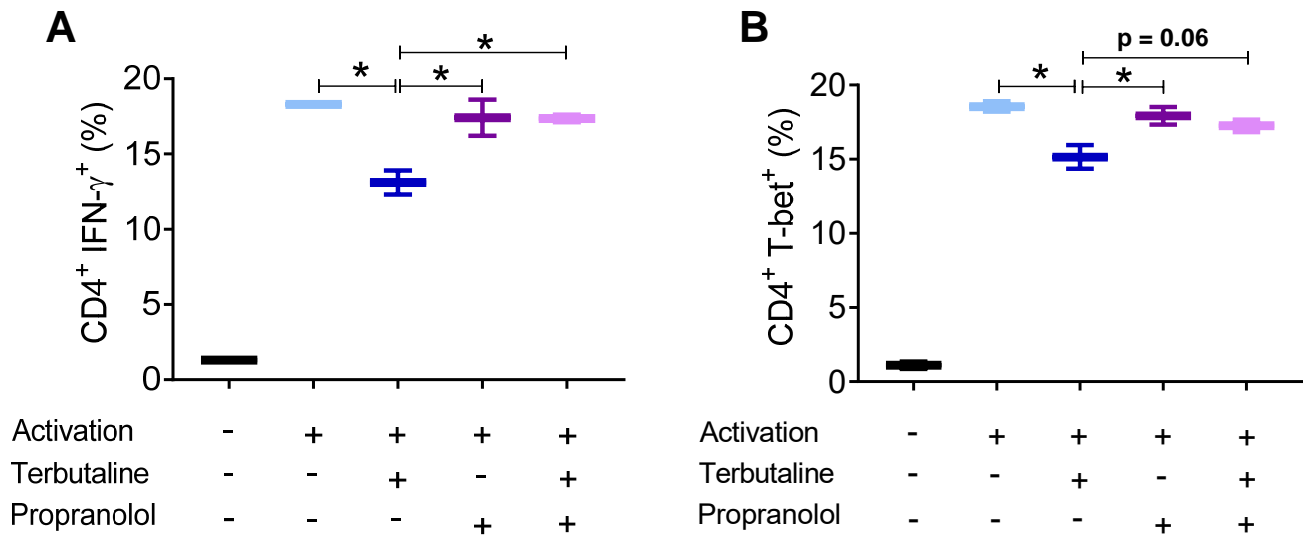

**Fig. S6. The activation of  $\beta$ 2-AR in T cells suppresses the development of Th1 cells.** CD4<sup>+</sup> T cells sorted from the spleens of healthy C57BL/6 mice were cultured in Th1 media plus CD3/C28 in different groups. Frequencies of (A) IFN- $\gamma$  and (B) T-bet positive T cells within singlet live CD4<sup>+</sup> T cell population were analyzed using flow cytometry. Data were pooled from three individual experiments, each with  $n = 2-3$  replicates per group. \* $P < 0.05$ . Data are presented as median  $\pm$  min to max.

**Fig. S7**

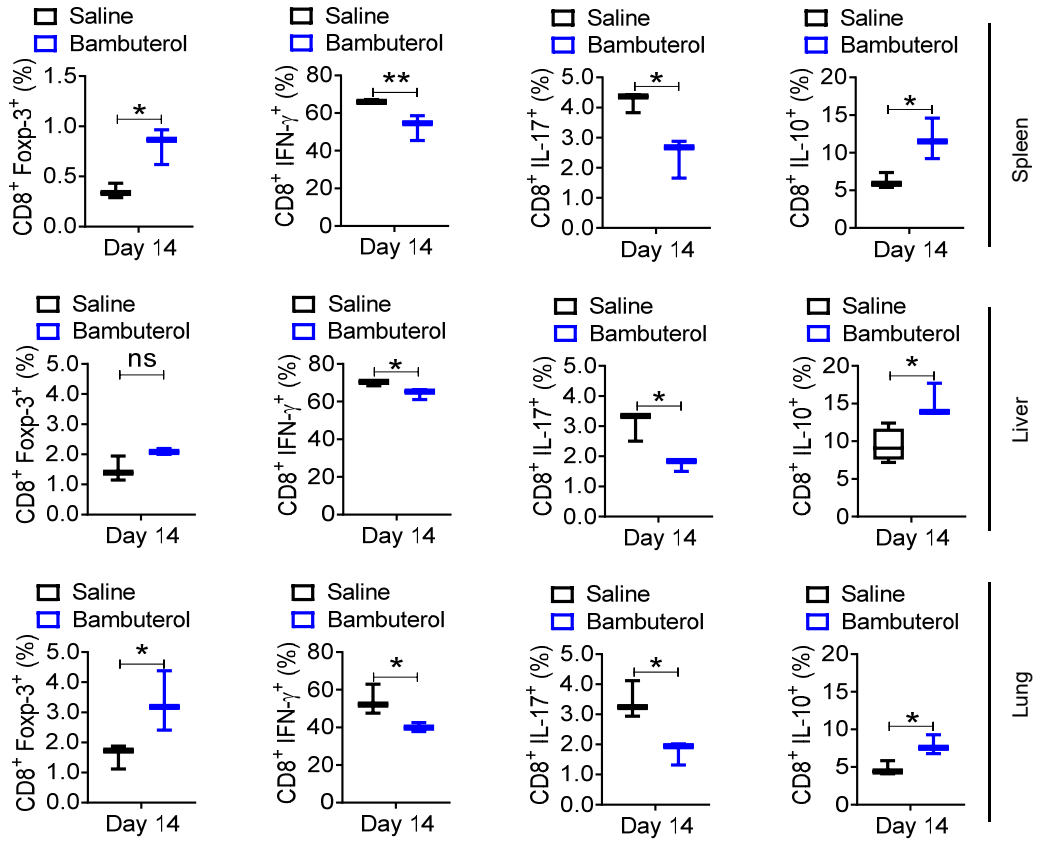

**Fig S7. The activation of  $\beta$ 2-AR by the selective  $\beta$ 2-AR agonist bambuterol regulates human T cell phenotypes in the NSG model of GvHD.** Frequencies of Foxp-3, IFN- $\gamma$ , IL-17, and IL-10 positive in CD8<sup>+</sup> T cells within single live CD45<sup>+</sup> CD3<sup>+</sup> populations from spleen, liver and lung of mice 14 days after allo-HCT. MDSCs were gated from single live CD45<sup>+</sup> CD3<sup>-</sup> populations. (Data pooled from two individual experiments,  $n=2-3$  per group, total of  $n=4-6$  per group). For comparison of the means, an unpaired two-tailed  $t$  test was used. \* $P < 0.05$ , \*\* $P < 0.01$ . Data are presented as median  $\pm$  min to max.

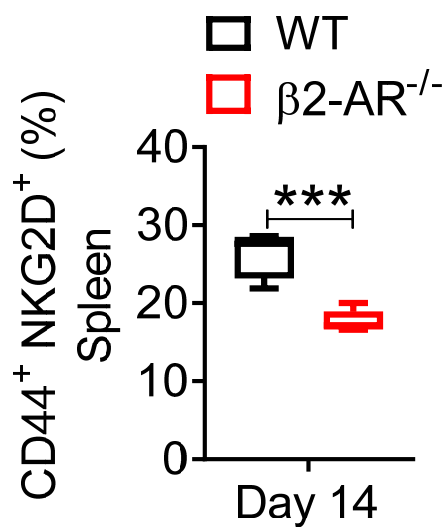

**Fig. S8. The activation of  $\beta 2\text{-AR}$  in T cells increases the expression of NKG2D on effector cells.** Lethally irradiated BALB/c mice were transplanted with WT C57BL/6 TCD-BM alone or combined with  $0.5 \times 10^6$  T cells purified from spleens of C57BL/6 WT or  $\beta 2\text{-AR}^{-/-}$  mice. Frequencies of  $\text{CD44}^+ \text{NKG2D}^+$  in  $\text{CD4}^+$  T cells within single live  $\text{H-2}^{\text{b+}} \text{H-2}^{\text{d-}} \text{CD45}^+ \text{CD3}^+$  populations from spleen day 14 after allo-HCT. (Data pooled from two individual experiments,  $n=2-3$  per group, total of  $n=4-6$  per group).  $***P < 0.001$ . data are presented as median  $\pm$  min to max.



Table S1: Scoring system (modified from ref<sup>35</sup>) was used for acute GvHD scoring

| <b>GvHD criteria</b> | Grade 1                     | Grade 2                        | Grade 3                                         | Grade 4                                                 |
|----------------------|-----------------------------|--------------------------------|-------------------------------------------------|---------------------------------------------------------|
| Weight loss          | 5-10%                       | 10 – 15%                       | 15 – 20%                                        | > 20%                                                   |
| Posture              | Hunching noted only at rest | Mild hunching also at movement | Moderate hunching and slightly impairs movement | Severe hunching impairs movement                        |
| Activity             | Mildly decreased            | Moderately decreased           | Noticeably decreased                            | Isolated in the corner and severely decreased           |
| Fur texture          | Mild ruffling               | Moderate ruffling              | Severe ruffling / poor grooming                 | Fur loss                                                |
| Skin integrity       | Mild patchy scaling of skin | Moderate scaling               | Several patchy scaling and inflammation of skin | Diffuse ulcerative skin lesions and severe inflammation |

Abbreviations: GvHD – graft-versus-host disease.

Table S2: List of antibodies

| <b>Mouse antibodies</b> |              |                |
|-------------------------|--------------|----------------|
| Antigens                | Clones       | Manufacturers  |
| CD8                     | 53-6.7       | BD Horizon™    |
| CD4                     | GK1.5        | BD Horizon™    |
| CD3                     | 17A2         | BD Pharmingen™ |
| CD45                    | 30-F11       | BioLegend™     |
| H2 <sup>b</sup>         | AF6-88.5     | BioLegend™     |
| H2 <sup>d</sup>         | SF1-1.1      | BioLegend™     |
| RORγt                   | Q31-378      | BD Horizon™    |
| T-bet                   | 4B10         | BD Pharmingen™ |
| Foxp-3                  | 150D         | BioLegend      |
| CD45.1                  | A20          | Invitrogen™    |
| CD45.2                  | 104          | Invitrogen™    |
| Live/dead               | Aqua         | Invitrogen™    |
| IFN-γ                   | XMG1.2       | BD Horizon™    |
| IL-17                   | TC11-18H10.1 | BioLegend™     |
| IL-10                   | JES5-16E3    | BioLegend™     |
| CD11b                   | M1/70        | BD Horizon™    |
| Gr-1                    | RB6-8C5      | BD Optibuild™  |
| β2-AR                   | Orb15065     | Biorbyt        |
| CD16/32 Block           | 2.4G2        | BD Pharmingen™ |
| CD44                    | IM7          | BioLegend™     |
| CD62L                   | MEL-14       | BioLegend™     |
| NKG2D                   | CX5          | BioLegend™     |
| <b>Human antibodies</b> |              |                |
| β2-AR                   | R11E1        | Santa Cruz Bio |
| CD8                     | RPA-T8       | BD Horizon™    |
| CD4                     | A161A1       | BioLegend™     |
| CD3                     | SK7          | BD Pharmingen™ |
| CD33                    | P67.6        | BioLegend™     |
| CD14                    | 63D3         | BioLegend™     |
| IFN-γ                   | 4S.B3        | BioLegend™     |
| IL-17                   | N49-653      | BD Pharmingen™ |
| IL-10                   | JES-9D7      | BD Horizon™    |
| Foxp-3                  | 150D         | BioLegend™     |
